# Supplementary material
Source: ML conference proceedings conference paper supplement (https://openreview.net/forum?id=B248iw8jce5)
Supplement: supplementary_material [file attachment]

# Bayesian Quantile and Expectile Optimisation - Supplementary material

Victor Picheny<sup>1</sup>

Henry Moss<sup>1</sup>

Léonard Torossian<sup>2</sup>

Nicolas Durrande<sup>1</sup>

<sup>1</sup>Secondmind Labs, Cambridge, UK  
<sup>2</sup>Inria, Université Côte d'Azur, France

## 1 SUPPLEMENTARY MATERIAL: CALCULATION OF Q-GIBBON

We derive here the analytical form of our proposed Q-GIBBON acquisition function. For simplicity, we focus on the quantile setting, but the expectile case only requires a straightforward modification of the following derivation.

Recall that Q-GIBBON is defined as

$$\alpha_n^{\text{Q-GIBBON}} = \frac{1}{2} \log |C| - \frac{1}{2M} \sum_{g^* \in \mathcal{M}_n} \sum_{i=1}^B \log V_i(g^*),$$

where  $|C|$  is the determinant of the  $B \times B$  predictive covariance matrix with elements  $C_{i,j} = \text{Cov}(y_{x_i}, y_{x_j} | \mathcal{D}_n)$  and  $V(g^*)$  denotes the conditional variances  $V_i(g^*) = \text{Var}(y_{x_i} | g^*, \mathcal{D}_n)$ . Therefore, calculating Q-GIBBON boils down to being able to calculate  $V_i(g^*)$  and  $C_{i,j}$  across any candidate batch of points (i.e. for all  $i, j \in \{1, \dots, B\}$ ). We now derive closed-form expressions for  $V_i(g^*)$  and  $C_{i,j}$ .

### 1.1 REQUIRED PREDICTIVE QUANTITIES

For ease of notation, we will consider just a single pair of input values of  $x_1$  and  $x_2$  and show how to calculate  $V_1(g^*)$  and  $C_{1,2}$ . Denote the quantiles, scales and (noisy) observations at these two location as  $g_1 = g(x_1) | \mathcal{D}_n$ ,  $g_2 = g(x_2) | \mathcal{D}_n$ ,  $\sigma_1 = \sigma(x_1) | \mathcal{D}_n$ ,  $\sigma_2 = \sigma(x_2) | \mathcal{D}_n$ ,  $y_1 = y(x_1) | \mathcal{D}_n$  and  $y_2 = y(x_2) | \mathcal{D}_n$ , respectively. Then, from our underlying GP models we can extract our current beliefs about these random variables:

$$\begin{aligned} \begin{pmatrix} g_1 \\ g_2 \end{pmatrix} &\sim N \left[ \begin{pmatrix} \mu_1^g \\ \mu_2^g \end{pmatrix}, \begin{pmatrix} (\sigma_1^g)^2 & \Sigma_{1,2}^g \\ \Sigma_{1,2}^g & (\sigma_2^g)^2 \end{pmatrix} \right], \\ \begin{pmatrix} \log(\sigma_1) \\ \log(\sigma_2) \end{pmatrix} &\sim N \left[ \begin{pmatrix} \mu_1^\sigma \\ \mu_2^\sigma \end{pmatrix}, \begin{pmatrix} (\sigma_1^\sigma)^2 & \Sigma_{1,2}^\sigma \\ \Sigma_{1,2}^\sigma & (\sigma_2^\sigma)^2 \end{pmatrix} \right]. \end{aligned}$$

For closed form expressions of  $\mu_1^g, \sigma_1^g, \dots$  see any GP textbook, e.g. Rasmussen [2003].

Before deriving expressions for  $V_1(g^*)$  and  $C_{1,2}$ , it is convenient to write the conditional mean and variance of our noisy observations  $y_1$  and  $y_2$ . Following Yu and Moyeed [2001], we have

$$\mathbb{E}[y_1 | g_1, \sigma_1] = g_1 + \frac{1 - 2\tau}{\tau(1 - \tau)} \sigma_1, \quad (1)$$

$$\text{Var}(y_1 | g_1, \sigma_1) = \frac{1 - 2\tau + 2\tau^2}{\tau^2(1 - \tau)^2} \sigma_1^2, \quad (2)$$

with similar expressions for the moments of  $y_2 | g_2, \sigma_2$

### 1.2 CALCULATING THE CONDITIONAL VARIANCE V

We now have all the quantities required to calculate  $V_1(g^*) = \text{Var}(y | g^*)$ . Recall that  $g^*$  denotes the maximal value obtained by the quantile (i.e.  $g(x)$ ). First, we use the law of total variance to decompose  $V_1$  into two terms:

$$\begin{aligned} V_1 &= \text{Var}_{g_1, \sigma | g^*} (\mathbb{E}[y_1 | g_1, \sigma_1, g^*]) \\ &\quad + \mathbb{E}_{g_1, \sigma | g^*} [\text{Var}(y_1 | g_1, \sigma_1, g^*)]. \end{aligned} \quad (3)$$

Note that conditioning on  $g_1, \sigma, g^*$  is equivalent to conditioning on  $g_1, \sigma$  only, as knowing that  $g^* = \max g(x)$  does not provide additional information over knowing  $g_1$  itself. Therefore, we can insert our expressions for the moments of the asymmetric Laplace (1) and (2) into (3) which, after simple manipulation provides:

$$\begin{aligned} V_1(g^*) &= \text{Var}_{g_1 | g^*}(g_1) + \frac{3(1 - 2\tau)^2 + 1}{2\tau^2(1 - \tau)^2} e^{2(\mu_1^\sigma + (\sigma_1^\sigma)^2)} \\ &\quad + \frac{(1 - 2\tau)^2}{2\tau^2(1 - \tau)^2} e^{2\mu_1^\sigma + (\sigma_1^\sigma)^2}. \end{aligned} \quad (4)$$

All that remains for the calculation of  $V(g^*)_1$  is an expression for  $\text{Var}_{g_1 | g^*}(g_1)$ . Fortunately, as shown by Wang and Jegelka [2017],  $g | g^*$  is simply an upper truncated Gaussian variable. Therefore, using the well-known expression for

the variance of a truncated Gaussian, we have

$$\text{Var}_{g_1|g^*}(g_1) = (\sigma_1^g)^2 \left( 1 + \frac{\phi(\gamma_{g^*})}{\Psi(\gamma_{g^*})} \left( \gamma_{g^*} - \frac{\phi(\gamma_{g^*})}{\Psi(\gamma_{g^*})} \right) \right), \quad (5)$$

where  $\gamma_{g^*} = \frac{g^* - \mu_1^g}{\sigma_1^g}$ , and  $\phi$  and  $\Psi$  are the probability density functions and cumulative density functions of a standard Gaussian variable, respectively.

Finally, inserting (5) into (4) yields a closed form expression for  $V_1(g^*)$ .

### 1.3 CALCULATING THE PREDICTIVE COVARIANCE C

Just like when calculating the conditional variance  $V_1$ , we begin our decomposition of  $C_{1,2} = \text{Cov}(y_1, y_2)$  by applying the law of total variance to get the following two term expansion:

$$C_{1,2} = \text{Cov}_{g_1, g_2, \sigma_1, \sigma_2} (\mathbb{E}[y_1|g_1, \sigma_1], \mathbb{E}[y_2, g_2, \sigma_2]) + \mathbb{E}_{g_1, g_2, \sigma_1, \sigma_2} [\text{Cov}(y_1, y_2|g_1, g_2, \sigma_1, \sigma_2)]. \quad (6)$$

Now, as  $y_1|g_1, \sigma_1$  and  $y_2|g_2, \sigma_2$  are independent (all that remains after this conditioning is observation noise), the second term of (6) is in fact zero (at least for unique  $x_1$  and  $x_2$ ).

To calculate the first term of (6), we insert the expression for the first moment of  $y|g, \sigma$  (i.e. Equation (1)) which, after recalling the independence of  $g$  and  $\sigma$ , yields

$$C_{1,2} = \text{Cov}_{g_1, g_2}(g_1, g_2) + \frac{(1 - 2\tau)^2}{\tau^2(1 - \tau)^2} \text{Cov}_{\sigma_1, \sigma_2}(\sigma_1, \sigma_2). \quad (7)$$

Finally, we can extract  $\text{Cov}(g_1, g_2)$  and  $\text{Cov}(\sigma_1, \sigma_2)$  from our underlying GP models as  $\Sigma_{1,2}^g$  and  $e^{\mu_1^\sigma + \mu_2^\sigma + 0.5(\sigma_1^\sigma + \sigma_2^\sigma)}(e^{\Sigma_{1,2}^\sigma} - 1)$  (using the formulae for the covariance of joint log Gaussian variables). Inserting these two covariances into (7) provides a closed-form expression for  $C_{1,2}$ .

## 2 SUPPLEMENTARY MATERIAL: RFF FOR MATERN KERNELS

We present in this section how to use RFFs to generate samples from  $d$ -dimensional Matern kernels with regularity  $\nu$ , variance  $\sigma^2$  and lengthscales  $\theta \in \mathbb{R}^d$ . First of all, we start from the spectral density of a Matérn kernel:

$$s(w) = \sigma^2 |\Lambda|^{1/2} \frac{\Gamma(\frac{d}{2} + \nu)}{\Gamma(\nu)} \frac{(2\sqrt{\pi})^d}{(1 + w^T \Lambda w)^{\frac{d}{2} + \nu}},$$

where  $\Lambda = \text{diag}(\theta_1, \dots, \theta_d)$  is the diagonal matrix containing the length scale hyperparameters. Using the change of variable  $\Lambda' = 2\nu \times \Lambda$  and introducing rescaling factor  $\sigma^2(\sqrt{2\pi})^d$ , one can recognise here the probability density function of the *multivariate t-distribution*:

$$p(w) = |\Lambda|^{1/2} \frac{\Gamma(\frac{d}{2} + \nu)}{\Gamma(\nu)\pi^{d/2}\nu^{d/2}} \frac{1}{(1 + \frac{1}{2\nu} w^T \Lambda w)^{\frac{d}{2} + \nu}}.$$

As a consequence, prior samples can be generated by computing

$$g(x) = \sigma \sqrt{2(\sqrt{2\pi})^d/m} \sum_{i=1}^m \omega_i \cos(w_i^T x + b_i)$$

where  $\omega_i \sim \mathcal{N}(0, 1)$ ,  $w_i \sim p$ ,  $b_i \sim \mathcal{U}(0, 2\pi)$ , and  $m$  is the number of features.

## 3 SUPPLEMENTARY MATERIAL: DESCRIPTION OF THE GLD SYNTHETIC CASE

Several formulations of the GLD exist, we use here the parameterisation of Freimer et al. [1988]. The GLD is defined by its quantile function:

$$Q(u) = \lambda_0 + \lambda_1 (T_1 - T_2), \quad (8)$$

with:

$$T_1 = \begin{cases} \frac{u^{\lambda_2 - 1}}{\lambda_2} & \text{if } \lambda_2 \neq 0 \\ \log(u) & \text{if } \lambda_2 = 0 \end{cases}$$

$$T_2 = \begin{cases} \frac{(1-u)^{\lambda_3 - 1}}{\lambda_3} & \text{if } \lambda_3 \neq 0 \\ \log(1-u) & \text{if } \lambda_3 = 0 \end{cases}.$$

Here, the only constraint for the parameter values is  $\lambda_1 > 0$ .

To define an experiment, each  $\lambda_j$  is a realisation of a GP, except for  $\lambda_1$  for which we use a softplus transform to ensure positivity:

$$\lambda_j(x) \sim \mathcal{GP}(0, k(\cdot, \cdot)), \quad j \in \{0, 2, 3\},$$

$$\phi(\lambda_1(x)) \sim \mathcal{GP}(0, k(\cdot, \cdot)),$$

with  $\phi^{-1}(w) = \log(1 + e^w)$ . All GPs have a Matern 5/2 kernel  $k$  with unit variance. We add to  $\lambda_0(x)$  a small quadratic mean function to avoid having the optimum located on the edges of the domain. We use a lengthscales of 0.5 in dimension 3 and 1.0 in dimension 6. These settings ensure that the 6-dimensional test cases do not have too many local optima.

## References

Marshall Freimer, Georgia Kollia, Govind S Mudholkar, and C Thomas Lin. A study of the generalized Tukey

lambda family. Communications in Statistics-Theory and Methods, 1988.

Carl Edward Rasmussen. Gaussian processes in machine learning. In Summer School on Machine Learning. Springer, 2003.

Zi Wang and Stefanie Jegelka. Max-value entropy search for efficient bayesian optimization. In International Conference on Machine Learning, 2017.

Keming Yu and Rana A Moyeed. Bayesian quantile regression. Statistics & Probability Letters, 2001.
